# MicroRNAs in flow-dependent vascular remodelling

Peter Neth<sup>1</sup>, Maliheh Nazari-Jahantigh<sup>1</sup>, Andreas Schober<sup>1,2\*</sup>, and Christian Weber<sup>1,2,3\*</sup>

<sup>1</sup>Experimental Vascular Medicine, Institute for Cardiovascular Prevention, Ludwig-Maximilians-University Munich, Pettenkoferstraße 9, 80336 Munich, Germany; <sup>2</sup>DZHK (German Centre for Cardiovascular Research), partner site Munich Heart Alliance, Munich, Germany; and <sup>3</sup>Cardiovascular Research Institute Maastricht, University Maastricht, Maastricht, The Netherlands

Received 31 January 2013; revised 6 April 2013; accepted 9 April 2013; online publish-ahead-of-print 23 April 2013

## Abstract

Changes in haemodynamic forces in the vascular system result in an altered expression of miRs, which play important gene-regulatory roles by pairing to the mRNAs of protein-coding genes to fine-tune post-transcriptional repression. The development and structure of blood vessels are highly adapted to haemodynamic forces, such as shear stress, cyclic stretch, and circumferential wall stress, generated by the conductance of blood. Thus, fluctuations in shear stress contribute to miR-regulated differential gene expression in endothelial cells (ECs), which is essential for maintenance of vascular physiology. Several microRNAs have been identified that are induced by high shear stress mediating an atheroprotective role, such as miR-10a, miR-19a, miR-23b, miR-101, and miR-143/145. While changes in the expression profile of miR-21 and miR-92a by high shear stress are associated with an atheroprotective function, low shear stress-induced expression of miR-21, miR-92a, and miR-663 results in a pathological EC phenotype. MiR-155 fulfils pleiotropic functions in different regions of vasculature, when exposed to different modes of shear stress. Thus, changes in shear stress result in differential expression of numerous miRs, triggering the balance between susceptibility and resistance to cardiovascular diseases. Further elucidating the regulation of miRs by flow may allow future clinical applications of miRs as diagnostic and therapeutic tools.

## Keywords

Vascular remodelling • Shear stress • microRNA • Atherosclerosis

The article is part of the Spotlight Issue on: Biomechanical Factors in Cardiovascular Disease

## 1. Introduction

The development and structure of blood vessels are highly adapted to haemodynamic forces, such as tangential shear stress and circumferential wall stress, generated by the pulsatile blood flow.<sup>1</sup> In the adult vasculature, the proper differentiation of the main cell types in the vessel wall, endothelial cells (ECs) and smooth muscle cells (SMCs), are closely linked to the local haemodynamic cues.<sup>2</sup> ECs are primarily exposed to the laminar flow, which generates a mean wall shear stress of ~15 dyn/cm<sup>2</sup> in the arterial system, although the actual values may considerably vary in different locations.<sup>3</sup> In this range, shear stress promotes the differentiation of embryonic stem cells into ECs, stimulates the antithrombotic activity of ECs, and inhibits EC proliferation.<sup>4–6</sup> In contrast, reduction in shear stress (e.g. by oscillatory flow) below a certain threshold increases the turnover of ECs due to enhanced apoptosis and proliferation and induces a pro-inflammatory phenotype characterized by adhesiveness of leucocytes.<sup>4,5</sup> Accordingly, low levels of shear stress due to disturbed flow are typically found in regions of the arterial tree, which are highly susceptible for atherosclerosis, such as branching points or the outer curvature of the aortic arch.<sup>6</sup>

In addition to shear stress, the transmural pressure difference induced by the blood pressure in the vascular lumen mechanically strains the

vessel wall. Due to the pulsatile changes of the blood pressure, the arterial wall is stretched by 2–15% during the cardiac cycle.<sup>4</sup> This cyclic mechanical stretch, which is tangential to the direction of the blood flow, primarily affects medial SMCs by promoting a contractile phenotype.<sup>7,8</sup> The contractility of SMCs is of crucial importance to establish the circumferential wall tension, which counteracts the transmural pressure difference and thereby regulates blood pressure and blood flow. Moreover, mechanical stretch modulates many functional features of SMCs, such as proliferation, apoptosis, and migration, which are closely related to vascular remodelling.<sup>8</sup> However, the degree of mechanical stretch appears to determine the type of response in SMCs. Physiologic strain maintains a quiescent and contractile phenotype, whereas static conditions and supra-physiologic stretch trigger a maladaptive response characterized by increased proliferation and enhanced synthetic capacity.<sup>7,9</sup> The mechanical stretch threshold that triggers SMC proliferation is much lower in venous than in arterial SMCs.<sup>10</sup> Therefore, venous bypass grafts are prone to neointima formation following arterIALIZATION. Moreover, increased wall tension in resistance arteries due to arterial hypertension promotes thickening of the media mainly by the development of hypertrophic, polyploid SMCs.<sup>9,11,12</sup> In addition to a reduced shear stress, mechanical stretch to the vessel wall is elevated at predilection sites of atherosclerosis and lowering circumferential

\* Corresponding author. Tel: +49 89 5160 4353, Email: chweber@med.lmu.de (C.W.); Email: aschober@med.lmu.de (A.S.)

wall tension can limit atherosclerosis, indicating that both haemodynamic factors play a role in atherogenesis.<sup>13,14</sup>

Together, shear stress and circumferential wall strain are crucial haemodynamic factors in the development of the vascular wall and in the differentiation of its main cell types, ECs and SMCs. However, disturbances of blood flow or blood pressure, for instance in regions of the arterial tree like branching points or the lower curvature of the aortic arch, can contribute to vascular diseases, such as atherosclerosis, by deranging the phenotype of vascular cells.

MicroRNAs (miRNAs) are small, non-coding, single-stranded RNAs, which regulate gene expression by post-transcriptional repression and thus modulate differentiation and cell fate decisions.<sup>15–18</sup> Accordingly, a network of microRNAs has been identified that controls the response of vascular cells to haemodynamic stress.

## 2. miRNAs regulate gene expression

In the human genome, more than 1000 miRNAs have been annotated up to now and their expression considerably varies in different cell types and during differentiation.<sup>19</sup> The transcription of intergenic miRNAs genes is regulated by transcription factors and many examples have been described that miRNAs regulate their own transcription by negative or positive feedback loops with specific transcription factors.<sup>20,21</sup> Notably, some miRNAs are encoded by introns of the protein-coding genes and thus their expression is regulated with the expression of the respective host genes, by generating co-transcriptional units of mRNA and miR.<sup>19</sup>

Mature miRNAs are generated from the primary transcripts by two subsequent steps of endonucleolytic cleavage by the ribonuclease enzymes Drosha and Dicer.<sup>22</sup> Following transcription by RNA polymerase II, the several kilobases long, primary miR (pri-miR) is processed by Drosha into a ~70 nt long precursor miR (pre-miR). After translocation into the cytoplasm by Exportin-5 (XPO5) in complex with the cofactor Ran-GTP, the pre-miR undergoes a second step of processing catalysed by Dicer, a member of the RNase III family.<sup>22</sup> Dicer complexes the Tar RNA binding protein (TRBP) which cleaves the pre-miR into the ~22 nt long mature miR duplex and mediates loading of one strand of the miR duplex, called guide strand, to Argonaute proteins. The second miR strand, the passenger strand, dissociates from the Argonaute protein by unwinding and is subsequently degraded.<sup>23,24</sup> However, miR passenger strands are not always degraded and both strands may co-accumulate in a tissue-dependent manner.<sup>25</sup> The abundance of the target mRNA expression for each miR strand modulates mature miR degradation and may thus contribute to tissue-dependent strand selection.<sup>26</sup> One member of the Argonaute protein family binds to GW182, which represents a glycine/tryptophan repeat protein. It has been shown that the N-terminal GW repeats of GW182 interact with the PIWI domain of Ago1, thereby forming the core protein component of the miR-induced silencing complex (miRISC) and protecting the miRNAs from degradation.<sup>27</sup> This complex presents the nucleotides 2–8 from the 5' end of the miR (the seed region) for target sequence recognition, which is essential for miR-mediated gene silencing. Annealing of the seed region with the complementary sequence primarily in the 3'-UTR of the target mRNA is often sufficient for target recognition.<sup>16</sup> However, this short target recognition element may be present in various mRNAs and thus a single miR can regulate the expression of a large number of target mRNAs.<sup>28</sup> The miRISC has been reported to inhibit cap-dependent translation at the initiation phase by interfering with ribosome recruitment<sup>29</sup> and at post-initiation steps by inhibiting ribosome elongation.<sup>30,31</sup> Moreover, the miRISC also mediates

deadenylation with subsequent decapping and degradation of the target mRNAs.<sup>31,32</sup> Thus, the target mRNA repression by miRNAs is mediated by inhibition of translation and/or mRNA degradation.<sup>31</sup>

## 3. miRNAs in the vascular development

During vertebrate embryogenesis, vascular patterning is initially guided by conserved genetic pathways that act before circulation. Subsequently, ECs must incorporate the mechanosensory stimulus of blood flow with these early signals to shape the embryonic vascular system.<sup>33</sup> Few details are known about how these signals are integrated during development; however, there is accumulating evidence that during vascular remodelling fluctuations in shear stress also affect the expression of miRNAs in ECs.<sup>34–36</sup>

Accordingly, interference with the miR biogenesis by deletion of Drosha, Argonaute 2 (Ago2), or Dicer demonstrated an essential role of miRNAs in cardiovascular development. Zebrafish Dicer-null embryos exhibited severe defects most prominently in gastrulation, brain morphogenesis, and cardiac development in association with a disrupted blood circulation.<sup>37,38</sup> Loss of the first two exons of the Dicer gene (*Dicer<sup>ex1/2</sup>*) in mice leads to lethality in early embryogenesis due to defective blood vessel formation and maintenance.<sup>39</sup> The defects observed in *Dicer<sup>ex1/2</sup>* embryos were associated with aberrant expression of vascular endothelial (VE) growth factor (VEGF), its receptors VEGFR1 and VEGFR2 as well as the putative angiopoietin-2 receptor (Tie-1), suggesting that Dicer fulfils a central role in embryonic angiogenesis, most likely by processing miRNAs that regulate the expression levels of key angiogenic regulators.<sup>38,39</sup> Correspondingly, the knockdown of Dicer in ECs *in vitro* altered expression patterns of proteins that play essential roles in EC biology and angiogenic responses, such as Tie-2/TEK, VEGFR2, endothelial nitric oxide synthase (eNOS), interleukin-8, and angiopoietin-like 4 (ANGPTL4).<sup>40</sup> Moreover, Dicer silencing in ECs increased the expression of thrombospondin-1 (Tsp1),<sup>41,42</sup> a multidomain matrix glycoprotein that has been shown to be an endogenous inhibitor of angiogenesis, which may explain, in part, the anti-angiogenic phenotypes observed *in vitro*.<sup>38</sup> Interestingly, knockouts of single miRNAs in mice are normally not associated with a lethal phenotype, most probably because special groups of miRNAs perform at least partially redundant roles.<sup>43</sup>

Shear stress induces pronounced changes in gene expression of ECs.<sup>44–46</sup> The effects of flow on the transcription of genes that are crucial for vascular homeostasis, such as platelet-derived growth factor B (PDGFB), nitric oxide synthase 3 (NOS3), and platelet endothelial cell adhesion molecule 1 (PECAM1), are regulated by shear stress-responsive elements (SSREs) within their promoter regions.<sup>47</sup> Fluid shear stress regulates binding of mechanosensitive transcription factors, such as nuclear factor kappa B (NF- $\kappa$ B) and early growth response 1, to SSREs in ECs, where they regulate blood vessel homeostasis. ECs also sense shear stress through a mechanosensory cell–cell adhesion complex containing PECAM-1, VE-cadherin, and vascular endothelial growth factor 2 (VEGFR2). Accordingly, flow-mediated mechanical distortion of the ECs activates NF- $\kappa$ B through the integrin-p38 MAPK signalling cascade.<sup>47–49</sup>

In addition, shear stress also controls the expression of various miRNAs, which are involved in the regulation of morphological and functional changes of ECs in response to flow. However, mechanisms concerning miR regulation by shear stress are only fragmentary understood.

To obtain a deeper understanding, several miR expression profiling studies in ECs have been performed to identify miR expression patterns

which are regulated by shear stress.<sup>50–55</sup> A subset of miRs has been identified that is induced by high shear stress mediating an atheroprotective role, including miR-10a, miR-19a, miR-23b, miR-101, miR-126, and miR-143/145. In contrast, low shear stress-induced expression of miR21a, miR-92a, and miR-663 results in an atheroprone EC phenotype. Based on these findings, this review article will discuss the regulation and the (patho)physiological functions of shear stress-regulated miRs in the context of vascular biology.

#### 4. miR-10a represses the inflammatory response of ECs

The mammalian miR-10 family is evolutionary ancient, highly conserved, and consists of miR-10a and miR-10b, which are encoded within the *HOX* gene cluster.<sup>56</sup> *HOX* genes encode evolutionary conserved transcription factors that are crucial for development.<sup>57</sup> Moreover, there is accumulating evidence for a close interplay between *HOX* gene regulation and the expression levels of miR-10 family members.<sup>56</sup> Due to the fact that miR-10a and miR-10b differ by only one base in the seed region, they are therefore predicted to share common targets. In this context, miR-10a/b have been shown to target several *HOX* transcripts during different developmental processes.<sup>58–60</sup> Up to now, p65 and TWIST are the only reported direct regulators of miR-10a and miR-10b, respectively.<sup>61,62</sup>

Interestingly, a recent *in vitro* study identified miR-10a as a flow-responsive induced miR in ECs,<sup>50</sup> which could be confirmed by Hergenreider *et al.*<sup>63</sup> In an *in vivo* study, the potential contributions of regulatory miRs within regions of susceptibility to atherosclerosis were investigated by artery site-specific miR profiling in adult swine.<sup>55</sup> This approach revealed that the expression of endothelial miR-10a was lower in the atherosusceptible regions of the inner aortic arch and aorta–renal branches than in other regions. mRNA microarray analysis of the miR-10a knockdown in cultured human aortic ECs identified I $\kappa$ B/NF- $\kappa$ B-mediated inflammation as the major pathway which was up-regulated after RNAi against miR-10a.<sup>55</sup> This indicates that miR-10a mediates an anti-inflammatory effect. It is of special interest that two key regulators of I $\kappa$ B $\alpha$  degradation, mitogen-activated kinase kinase 7 (MAP3K7; TAK1) and  $\beta$ -transducin repeat-containing gene (*BTRC*),<sup>64</sup> contain a highly conserved miR-10a binding site in their 3'-UTR, which mediate miR-10a suppression of these pro-inflammatory molecules.<sup>55</sup> Thus, the induction of miR-10a upon shear stress contributes to the repression of pro-inflammatory endothelial phenotypes in atherosusceptible regions *in vivo* (Figure 1A).

#### 5. miRNA-21 mediates different effects on ECs upon high and low shear stress

miR-21 plays a fundamental role in the regulation of (patho)physiological processes, including development, cancer, inflammation, and cardiovascular diseases.<sup>65</sup> The gene of pri-miR-21 is located in the intronic region of the *TMEM49* gene, where it is independently transcribed by its own promoter.<sup>66</sup> Early studies of miR-21 regulation revealed that the pairs IL6/STAT3 and PMA/AP-1 were effective inducers of miR-21 expression.<sup>67–69</sup> Moreover, additional reports have unravelled multiple alternative regulators for miR-21, such as induction through Ras, ERK1/2, EGFR, and oestrogen receptor.<sup>70–73</sup>

In a recent study performed on human umbilical vein endothelial cells (HUVECs) exposed to prolonged unidirectional shear (USS) stress, 13 miRs were identified whose expression was significantly up-regulated.<sup>52</sup> The miR with the greatest change was miR-21. PTEN, a known target of miR-21, was down-regulated in HUVECs exposed to USS or transfected with pre-miR-21. HUVECs overexpressing miR-21 had decreased apoptosis and increased eNOS phosphorylation and nitric oxide (NO) production.<sup>52</sup> Moreover, miR-21 decrease EC migration via repression of RhoB.<sup>74</sup> Therefore, these data point to an atheroprotective function miR-21 (Figure 1B).

Another study revealed that oscillatory shear stress (OSS) induces the expression of miR-21 at the transcriptional level in cultured human umbilical vein ECs via an increased binding of c-Jun to the promoter region of miR-21.<sup>75</sup> OSS induction of miR-21 inhibited the translation of peroxisome proliferator-activated receptor- $\alpha$ , an important anti-inflammatory mediator in the vessel wall,<sup>76,77</sup> by 3'-UTR targeting. OSS and overexpression of miR-21 enhanced the expression of adhesion molecules, vascular cell adhesion molecule-1 (VCAM-1), and monocyte chemotactic protein-1 and the consequential adhesion of monocytes to ECs. These findings suggest the presence of a positive feedback loop that enables the sustained induction of miR-21, thus contributing to the pro-inflammatory responses of vascular endothelium under OSS<sup>75</sup> (Figure 2A). It is noteworthy that the latter study is in contrast to the findings by Weber *et al.*<sup>52</sup> This discrepancy might be explainable by the fact that miR-21 is differentially regulated by diverging modes of shear stress or by additional factors beyond shear stress.<sup>65</sup>

#### 6. miRNA-126 is essential for EC homeostasis

MiR-126 and its complement miR-126\* are encoded by the *egf17* gene within intron 7 in vertebrates,<sup>78,79</sup> which plays an important role in angiogenesis.<sup>80</sup> Expression analyses revealed abundant levels of miR-126 in highly vascularized tissues, and identified miR-126 as the only miRNA known to be specifically expressed in the EC lineage and haematopoietic progenitor cells.<sup>79,81</sup>

The absence of miR-126 during development increases vascular permeability and leakage, which is mainly due to up-regulation of the miR-126 targets SPRED-1 and PIK3R, which are both inhibitors of VEGF signalling.<sup>79,81</sup> Accordingly, loss of miR-126 *in vivo* caused impaired EC migration during vessel growth as well as collapsed vessel lumen and a compromised endothelial tube organization.<sup>79,81</sup> In a recent study in zebrafish, it has been shown that mature vessels express high levels of miR-126, which potentiate phosphoinositide-3-kinase (PI3K)-mediated angiopoietin 1 (Ang-1) signalling by reducing the levels of the PI3K regulatory subunit 2 (p85 $\beta$ ). This regulatory circuit enhances the remodeling and stabilization effect of Ang-1.<sup>82</sup>

Notably, the passenger strand of pre-miR-126 is not completely degraded. As a consequence, miR-126 and miR-126\* are both highly expressed.<sup>81</sup> KLF2 transcriptionally regulates miR-126 expression during development. While KLF2 induced by shear stress increase miR-126 levels in zebrafish,<sup>34</sup> no flow or KLF2-dependent up-regulation of miR-126 was detectable in human ECs.<sup>54,63</sup> miR-126 mediates up-regulation of CXCL12 by apoptotic bodies derived from ECs.<sup>83</sup> Targeting of RGS16 by miR-126 promotes a positive feedback loop in which increased activation of CXCR4 in the absence of RGS16 induces CXCL12 expression (Figure 3). Accordingly, the paracrine atheroprotective effect of apoptotic bodies derived from ECs is caused by

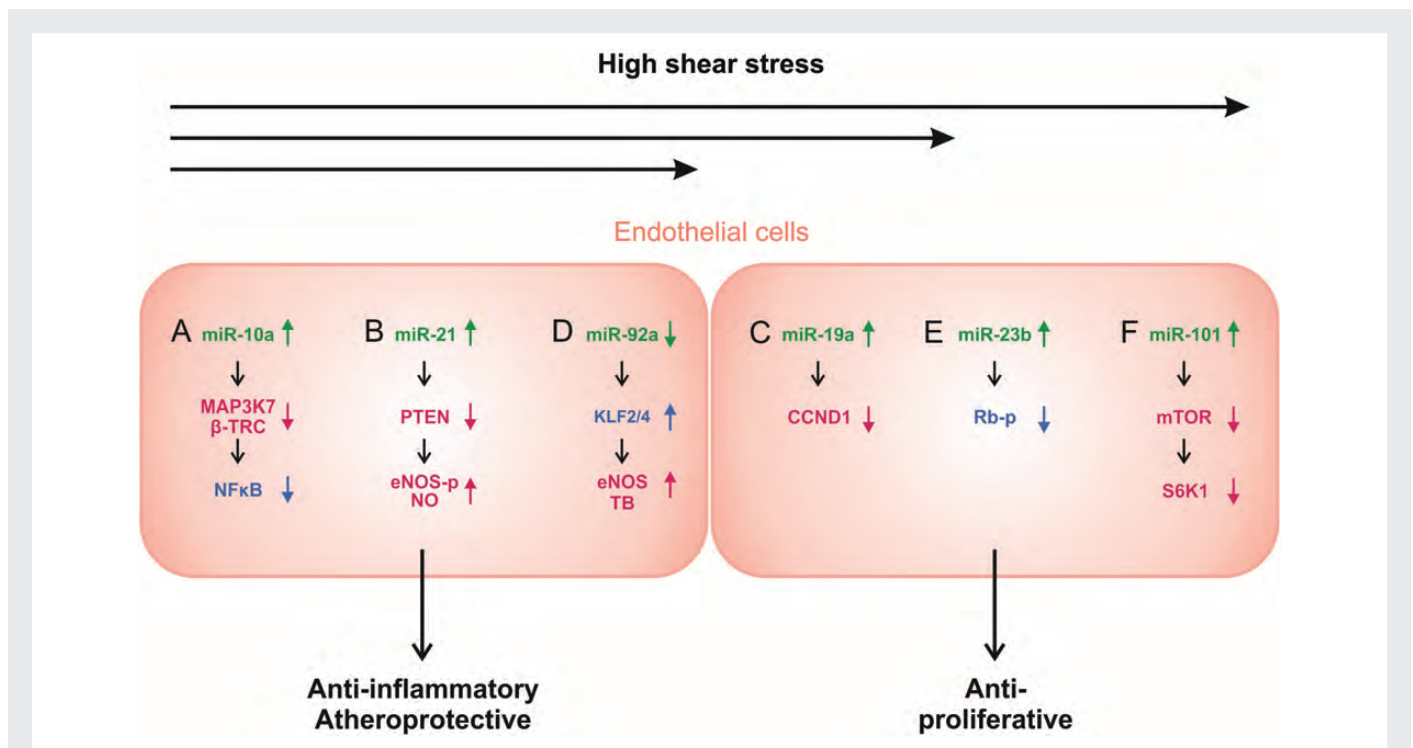

**Figure 1** Shear stress-regulated miRs that support a physiological phenotype of ECs. While high shear stress (HSS) induces the up-regulation of miR-10a (A) and miR-21 (B), miR-92a (D) is repressed under these conditions leading to an anti-inflammatory and/or atheroprotective EC phenotype (left). Moreover, high shear stress comes along with an induction of miR-19a (C), miR-23b (E), and miR-101 (F) resulting in an anti-proliferative status of ECs. Colours: miRs, green; transcription factors or proteins that regulate transcription factor functions, blue; (general) mediators, red.  $\beta$ -TRC,  $\beta$ -transducin repeat-containing gene; CCND1, Cyclin D1; eNOS-p, phosphorylated endothelial nitric oxide synthase; HSS, high shear stress; KLF2/4, Krüppel-like factor 2 and 4; LSS, laminar shear stress; mTOR, mammalian target of rapamycin; MAP3K7, mitogen-activated kinase kinase kinase 7; NF- $\kappa$ B, nuclear factor  $\kappa$ B; NO, nitric oxide; PTEN, phosphatase and tensin homolog; Rb-p, phosphorylated retinoblastoma; S6K1, ribosomal S6 kinase 1; TB, thrombomodulin.

increased expression of CXCL12 inducing the recruitment of cells to the endothelial lining.<sup>83</sup> Transfer of miR-126 enriched apoptotic bodies or even miR-126 itself into the ApoE knockout mice reduces the size of lesions, suggesting that the anti-atherosclerotic effect of ECs derived apoptotic bodies is at least partially performed by miR-126.<sup>83,84</sup> MiR-126 modestly suppresses endothelial VCAM-1 expression and leucocyte adhesion by activated ECs, which may contribute to its atheroprotective role.<sup>85</sup> Interestingly, circulating levels of miR-126 are substantially reduced in patients with coronary artery disease or insulin resistance/diabetes, which may be caused by defective packaging of miR-126 into endothelial microvesicles.<sup>86,87</sup> Recently, it has been demonstrated that miR-126 is substantially highly expressed in human CD34<sup>+</sup> compared with CD34<sup>-</sup> peripheral blood mononuclear cell (PBMC) subsets.<sup>88</sup> Notably, miR-126 was secreted by CD34<sup>-</sup> PBMC subsets, largely in microvesicles and exosomes. These vesicles were taken up by ECs which resulted in increased tube formation capacity. Notably, high-glucose treatment or diabetes reduced miR-126 levels of CD34<sup>+</sup> PBMCs, which was associated with impaired proangiogenic properties.<sup>89</sup> Moreover, it has been shown that miR-126 is expressed in HSC and early progenitors playing a pivotal role in restraining cell cycle progression of HSC *in vitro* and *in vivo*.<sup>90</sup> miR-126 knockdown resulted in HSC proliferation without inducing exhaustion leading to an expansion of mouse and human long-term repopulating HSC. Conversely, enforced miR-126 expression impaired cell cycle entry, which came along with a progressively reduced haematopoietic contribution.

MiR-126 regulates multiple targets within the PI3K/AKT/GSK3 $\beta$  pathway, attenuating signal transduction in response to extrinsic signals. Thus, miR-126 sets a threshold for HSC activation and governs HSC pool size, demonstrating the importance of miRNA in the control of HSC function.<sup>90</sup> Concerning this background, it becomes feasible that also miR-126 containing microvesicles from other cell types are involved in the regulation of the HSC phenotype.

In summary, miR-126 plays a pivotal role by maintaining homeostasis of EC; however, shear stress regulation of miR-126 has only been demonstrated in zebrafish up to now (Figure 3).

## 7. Shear stress-induced expression changes of miR-17~92a cluster members

The precursor transcript derived from the miR-17-92 gene contains six tandem stem-loop structures that generate six mature miRNAs, namely miR-17, miR-18a, miR-19a, miR-20a, miR-19b, and miR-92a.<sup>91,92</sup> These six miRNAs can be categorized according to their seed sequence into three separate miRNA families: the miR-17 family (miR-17, miR-18, miR-20), the miR-19 family (miR-19a, miR-19b), and the miR-92 family.<sup>92</sup> The transcription of miR-17-92 is directly activated by c-Myc. This finding is consistent with the functions of miR-17-92 in promoting

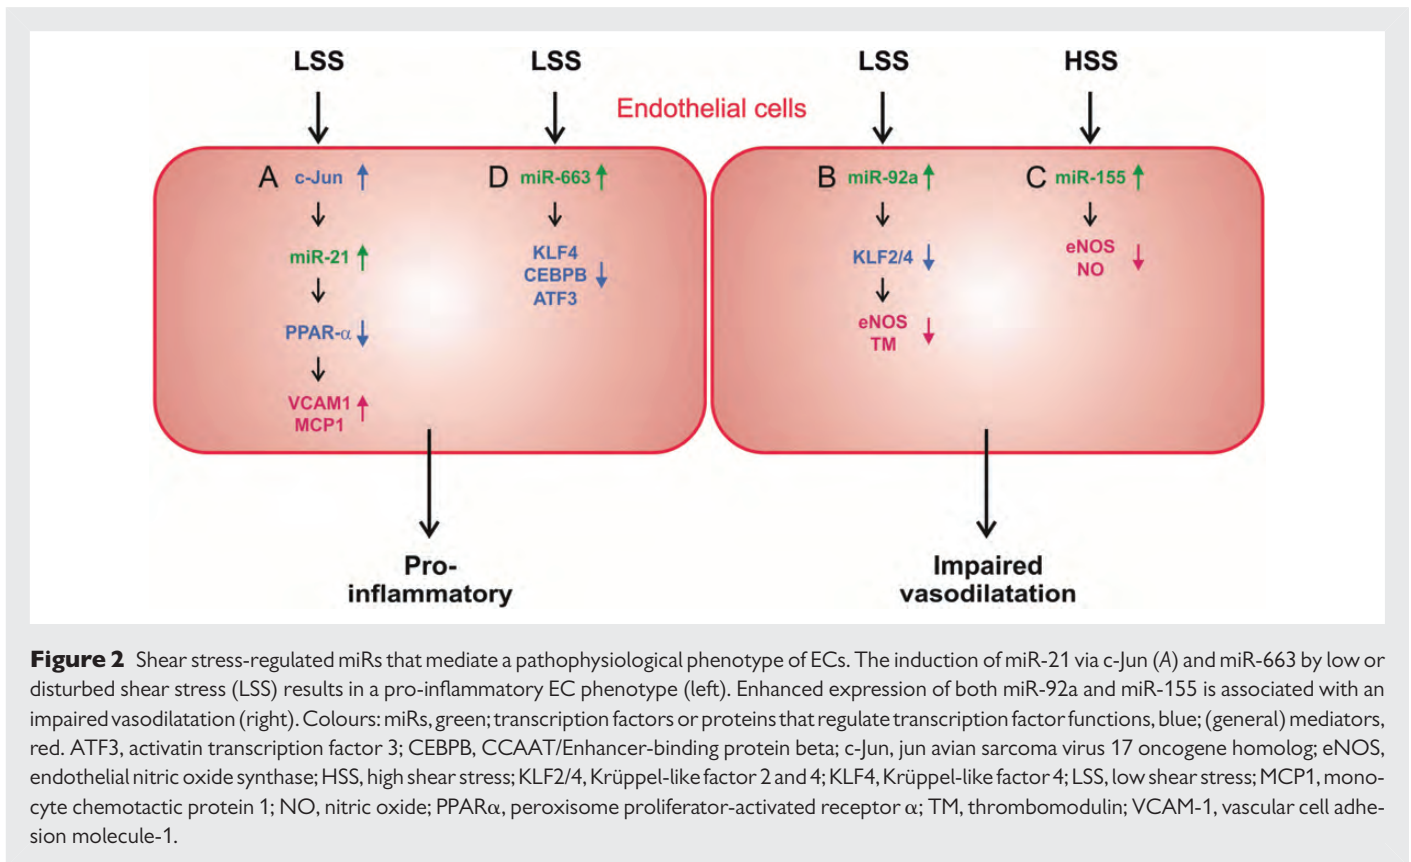

proliferation in a variety of cell types, including cells of lymphoid, epithelial, and neural origin.<sup>92</sup> Moreover, the E2F family of transcription factors has been identified to bind to the promoter of miR-17-92 for regulating its transcription.<sup>93,94</sup> Collectively, these studies suggest a model, wherein c-Myc induces the proliferative machinery but establishes a threshold of E2F expression through repression by miR-17-92.<sup>95</sup>

Intriguingly, it has been recently reported that some members of the miR-17-19 cluster were regulated by changes in flow.<sup>51</sup> In this approach, miR-17, miR-20a, and miR-92a were down-regulated upon pulsative flow. In contrast, laminar shear stress induces miR-19a expression in ECs, which plays an important role in the flow-regulated expression of cyclin D1 and endothelial proliferation<sup>50</sup> (Figure 1C). Another study demonstrated that miR-92a is repressed by laminar flow and up-regulated by oscillatory flow.<sup>96</sup>

In this setting, it has been shown *in vivo* that miR-92a is highly expressed in ECs which were isolated from the atherosusceptible aortic arch when compared with atherosusistant regions,<sup>97</sup> indicating that miR-92a might impair endothelial functions during atherogenesis (Figure 2B).

Endothelial KLFs, particularly KLF4 and KLF2, are critical transcriptional regulators of endothelial homeostasis by establishing an anti-inflammatory, vasodilatory, and antithrombotic vascular phenotype.<sup>98–101</sup> *In silico* predictions and experimental validation demonstrated that endothelial miR-92a is an upstream regulator of KLF4 biogenesis and also plays a role in KLF2 expression.<sup>96,97</sup> Both KLFs are flow-induced transcription factors and their structural homology is closely correlated with functional similarity of regulation by miR-92a.<sup>101</sup>

Beside the regulation of KLF4 by shear stress, its expression is also induced by pro-inflammatory stimuli.<sup>100</sup> Overexpression of KLF4 in ECs activates expression of anti-inflammatory and antithrombotic

genes, such as those that encode eNOS and thrombomodulin, whereas reduction in KLF4 levels increases tumour necrosis factor- $\alpha$ -induced expression of VCAM-1 and tissue factor.<sup>100</sup> KLF2 is restricted to the endothelium of healthy aorta, in regions exposed to laminar shear stress.<sup>45</sup> In contrast, KLF2 expression is decreased or absent in vessel regions which are exposed to non-laminar shear stress, such as bifurcations of the aorta to the iliac and carotid arteries, which are highly susceptible to atherosclerosis.<sup>46</sup> It is well established that KLF2 induces eNOS expression and mediates pleiotropic athero-protective effects.<sup>102</sup> Moreover, endothelial expression of KLF2 mediates paracrine effects on cocultured SMCs by reducing their migration capacity.<sup>103</sup> This is similar to the failure of SMCs to properly migrate to the developing aorta in KLF2<sup>-/-</sup> mouse embryos.<sup>104</sup> Overexpression of miR-92a inhibits the expression of eNOS and administration of miR-92a into mice decreases the expression of KLF2 and eNOS in the arteries.<sup>96</sup> The reciprocal expression of endothelial miR-92a and KLF4/2 in arterial regions exposed to locally disturbed blood flow *in vivo* is consistent with underlying haemodynamic mechanisms, including the flow-sensitive nature of KLF4 and KLF2.<sup>45,105</sup> Wu *et al.*<sup>96</sup> recently reported that an atheroprone flow waveform increased not only the level of endothelial miR-92a but also the association of miR-92a and KLF2 mRNA with both Ago1 and Ago2 proteins that are associated with the RNA-induced silencing complex, providing molecular evidence for the regulation of endothelial KLFs by miR-92a. Consistent with these observations, mouse carotid arteries receiving miR-92a precursor exhibited impaired vasodilatory response to flow. Taken these findings together, atheroprotective flow patterns decrease the level of miR-92a, which in turn increases KLF4/2 expression to maintain endothelial homeostasis<sup>96</sup> (Figure 1D).

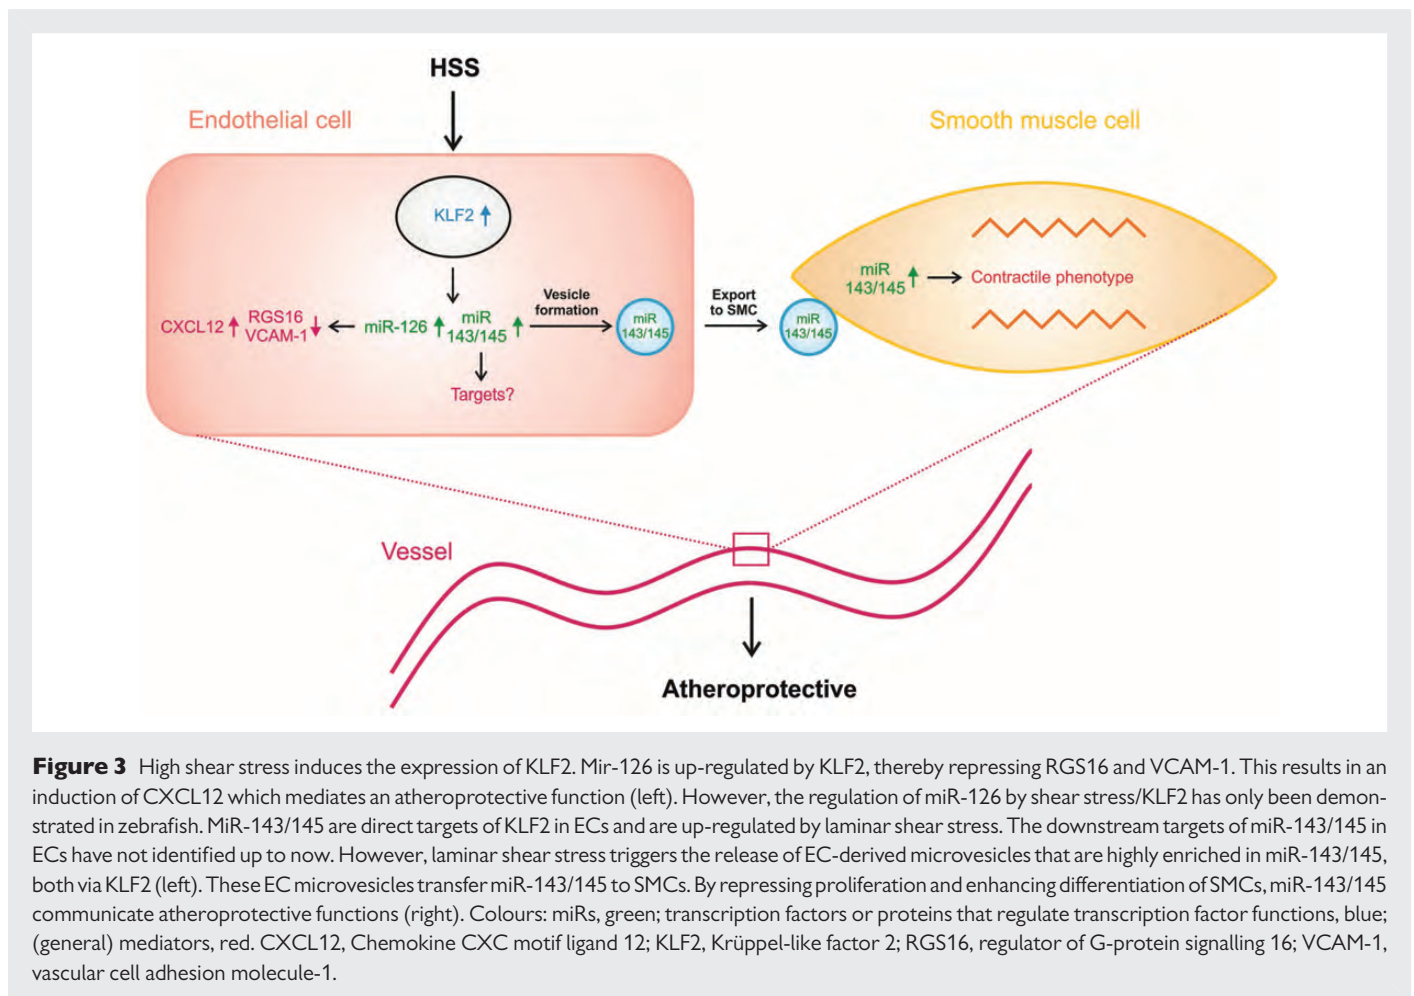

## 8. miR-23~27~24 cluster members regulate cell cycle progression and angiogenesis

The mouse miR-23a~27a~24-2 cluster is located on an intergenic region of chromosome 8, whereas the miR-23b~27b~24-1 cluster is located in intron 4 of an alanine aminopeptidase gene on chromosome 13107. All cluster members are highly expressed in vascularized tissues, such as the heart and lung, and in ECs. The mature miRNA sequences of miR-23a/b, miR-27a/b, and miR-24 are conserved among vertebrate species.<sup>106</sup>

Several studies have shown that some members of these clusters are up-regulated by laminar flow, such as miR-23b, miR-27a, and miR-27b.<sup>51,106</sup> The induction of miR-23b by shear stress has been shown to inhibit cell cycle progression by blocking the phosphorylation of the retinoblastoma protein<sup>51</sup> (Figure 1E). MiR-27a and miR-27b are highly expressed in ECs. Moreover, miR-27b is down-regulated after Dicer or Drosha silencing and inhibition of miR-27b significantly reduced EC sprouting *in vitro*, pointing to a proangiogenic role of miR-27b.<sup>41</sup> In this context, it has been shown that miR-27a/b promotes angiogenesis by binding to the 3'-UTR of the angiogenesis inhibitor SEMA6A, which controls the repulsion of neighbouring ECs.<sup>107</sup> Moreover, miR-27a/b regulate angiogenesis and choroidal neovascularization by targeting the anti-angiogenic protein Sprouty.<sup>106</sup>

## 9. Induction of miR-143 and miR-145 by high shear stress is atheroprotective

miRNA-143/145 are highly expressed in SMCs and are encoded by a bicistronic transcript. miR-145 and miR-143 are co-transcribed in multipotent cardiac progenitors before becoming localized to SMCs, including neural crest stem cell-derived vascular SMCs.<sup>108,109</sup> The promoter of miRNA-143/145 is regulated by a transcription factor complex consisting of serum response factor and coactivators of the myocardin family.<sup>108,109</sup> Moreover, the miR-143/145 promoter contains a Smad consensus sequence and is activated in response to transforming growth factor- $\beta$  (TGF- $\beta$ ) signalling.<sup>110</sup> Furthermore, miR-145 and miR-143 cooperatively targeted a network of transcription factors, including Klf4, myocardin, and Elk-1 to promote differentiation and repress proliferation of SMCs.<sup>108</sup> miR-143/145-deficient mice have a thinner medial layer in arteries and decreased blood pressure, indicating severely disturbed SMC homeostasis.<sup>109,111,112</sup> SMCs in miR-143/145<sup>-/-</sup> mice are partially dedifferentiated which comes along with a diminished expression of SMC-specific contractile proteins and actin stress fibres.<sup>109,111,112</sup>

Shear stress up-regulates miR-143/145 in ECs and triggers the release of EC-derived microvesicles that are highly enriched in miR-143/145, both via KLF2.<sup>63</sup> These EC microvesicles transfer miR-143/145 to SMCs, and

treatment with microvesicles derived from KLF2-overexpressing ECs reduces atherosclerosis in a miR-143/145-dependent manner<sup>63</sup> (Figure 3).

It may be hypothesized from these *in vivo* studies that elevated levels of miR-143/145 promote a SMC phenotype which is atheroprotective by preventing dedifferentiation.<sup>113</sup> However, although the experimental findings *in vitro* are promising, the respective *in vivo* evidence for intercellular exchange of information through miRNA microvesicles is still lacking.<sup>84</sup>

## 10. MiR-155 regulates vascular response by haemodynamic forces

MiR-155 is encoded by B-cell Integration Cluster (BIC)<sup>114</sup> and is involved in various biological processes such as haematopoiesis, immunity, and inflammation.<sup>115–118</sup> MiR-155 plays an important role in cardiovascular disease and is expressed in myeloid cells, macrophages, vascular SMC, and ECs.<sup>52,118–120</sup>

MiR-155 expression is induced by prolonged high shear stress in HUVECs, suggesting that it may moderate the atheroprotective effects of high shear stress in arterial ECs.<sup>52</sup> Moreover, miR-155 modulates NO production in HUVECs by targeting endothelial NO synthase and thereby regulates endothelium-dependent vascular relaxation.<sup>121</sup> Thus miR-155 may regulate part of EC responses to shear stress (Figure 2C).

It has been recently shown that miR-155 expression is induced in response to acutely disturbed blood flow in the arteries of hyperlipidaemic mice. In the model of flow-induced atherosclerosis, miR-155 plays a pro-inflammatory role in the lesional macrophages and leads to exacerbated lesion formation.<sup>120</sup> However, miR-155 plays an anti-inflammatory role in hyperlipidaemic mice without induced disturbed blood flow and ultimately reduces atherosclerosis.<sup>120,122</sup> These data provide evidences for the potential role of miR-155 in response to altered blood flow and therefore progression of atherosclerosis.

Angiotensin II plays an important role in the regulation of blood pressure by activating contraction of vascular SMCs.<sup>123,124</sup> Most of the physiological effects of Ang II are mediated by Angiotensin II receptor, type 1 (AT1R).<sup>125</sup> MiR-155 is a post-transcriptional regulator of AT1R expression in human primary lung fibroblasts.<sup>126</sup> Impaired miR-155-mediated suppression of AT1R could be implicated in hypertension and cardiovascular diseases.<sup>127</sup> Taken together, these data suggest that miR-155, expressed in different vascular cells, regulates several targets in each cell type and thereby contribute in regulation of vascular response to haemodynamic forces directly or indirectly. However, the functional role of miR-155 in different regions of vasculature exposed to different shear stresses need to be further studied.

Just recently, it could be demonstrated by our group that during early atherosclerosis the most prominently up-regulated miRNA was miR-342-5p, which is expressed in lesional macrophages. Upon pro-inflammatory activation in macrophages *in vitro*, miR-342-5p promoted Nitric oxide synthase 2 (Nos2) expression in a miR-155-dependent manner by targeting Akt1, an inhibitor of miR-155 expression. Accordingly, the inhibition of miR-342-5p reduced atherosclerotic lesion formation and suppressed Akt1-dependent Nos2 expression in lesional macrophages.<sup>128</sup>

## 11. miR-101 inhibits cell cycle progression in ECs

In a recent study, it was reported that miR-101 is up-regulated in ECs exposed to laminar shear stress.<sup>129</sup> Bioinformatic analysis revealed

mTOR as putative target of miR-101, containing a highly conserved and functional miR-101 binding site in its 3'-UTR.<sup>129</sup> Basically, cell cycle progression is promoted by mTOR through its downstream effector S6K1, which accelerates the G1/S transition.<sup>130</sup> Transfection of miR-101 led to a lower proportion of cells in S phase and a higher proportion in G0/G1 phase, indicating that miR-101 attenuated G1/S transition of cell cycle in ECs upon laminar shear stress<sup>129</sup> (Figure 1F).

## 12. miR-663 regulates KLF4 expression in ECs

By a microarray analysis of HUVECs that were exposed to OSS or LSS several miRs were identified that exhibited differential expression, in which miR-663 exhibited the most OSS-sensitive expression pattern.<sup>54</sup> Using a miR-663-specific inhibitor revealed that miR-663 specifically mediated OSS-induced monocyte adhesion to EC, pointing to a pro-inflammatory function of miR-663. In this study, several transcription factors (KLF4, CEBPB, ATF3) were identified targets of miR-663 under OSS conditions, which are involved in the regulation of numerous genes that are related to inflammatory responses. Interestingly, inhibiting miR-663 with miR-663-LNA restores KLF4 expression in ECs under OSS. This indicates that—in addition to miR-92a—OSS-induced miR-663 is critically involved in fine-tuning of KLF4 expression in ECs<sup>54,100</sup> (Figure 2D).

## Conclusion

There is accumulating evidence that changes in shear stress affect the expression of miRs which mediate (patho)physiological changes of vascular cells during arterial remodelling and atherogenesis. This includes the control of the inflammatory response in ECs and macrophages as well as the regulation of the SMC phenotype following vascular injury. However, in many cases little knowledge exists with regard to the upstream signal transduction cascades controlling the expression of miRs under flow. Thus, the identification of shear stress-induced molecular pathways which affect miR expression in different vascular cell types is indispensable. Moreover, the ability to therapeutically manipulate miR expression and function through systemic or local delivery of miR inhibitors or mimics opens up a novel route for a new class of disease-modifying therapeutics based on miR biology. In this context, a deeper understanding of shear stress-regulated miRs will be beneficial for the development of miR-related therapeutic strategies in the treatment of cardiovascular diseases.

## Funding

Our work has been supported by supported by the DZHK (German Centre for Cardiovascular Research, MHA VD1.2) and by the BMBF (German Ministry of Education and Research, META JTC2011 miR-A).

**Conflict of interest:** none declared.

## References

1. Jones EA, le Noble F, Eichmann A. What determines blood vessel structure? Genetic prespecification vs. hemodynamics. *Physiology* 2006;**21**:388–395.
2. Hahn C, Schwartz MA. Mechanotransduction in vascular physiology and atherogenesis. *Nat Rev Mol Cell Biol* 2009;**10**:53–62.
3. Cheng C, Helderman F, Tempel D, Segers D, Hierck B, Poelmann R et al. Large variations in absolute wall shear stress levels within one species and between species. *Atherosclerosis* 2007;**195**:225–235.
4. Ando J, Yamamoto K. Effects of shear stress and stretch on endothelial function. *Antioxid Redox Signal* 2011;**15**:1389–1403.
5. Riha GM, Lin PH, Lumsden AB, Yao Q, Chen C. Roles of hemodynamic forces in vascular cell differentiation. *Ann Biomed Eng* 2005;**33**:772–779.

6. Chiu JJ, Chien S. Effects of disturbed flow on vascular endothelium: pathophysiological basis and clinical perspectives. *Physiol Rev* 2011;**91**:327–387.
7. Williams B. Mechanical influences on vascular smooth muscle cell function. *J Hypertens* 1998;**16**:1921–1929.
8. Haga JH, Li YS, Chien S. Molecular basis of the effects of mechanical stretch on vascular smooth muscle cells. *J Biomech* 2007;**40**:947–960.
9. Anwar MA, Shalhoub J, Lim CS, Gohel MS, Davies AH. The effect of pressure-induced mechanical stretch on vascular wall differential gene expression. *J Vasc Res* 2012;**49**:463–478.
10. Predel HG, Yang Z, von Segesser L, Turina M, Buhler FR, Luscher TF. Implications of pulsatile stretch on growth of saphenous vein and mammary artery smooth muscle. *Lancet* 1992;**340**:878–879.
11. Owens GK, Rabinovitch PS, Schwartz SM. Smooth muscle cell hypertrophy versus hyperplasia in hypertension. *Proc Natl Acad Sci USA* 1981;**78**:7759–7763.
12. Heagerty AM, Aalkjaer C, Bund SJ, Korsgaard N, Mulvany MJ. Small artery structure in hypertension. Dual processes of remodeling and growth. *Hypertension* 1993;**21**:391–397.
13. Thubrikar MJ, Baker JW, Nolan SP. Inhibition of atherosclerosis associated with reduction of arterial intramural stress in rabbits. *Arteriosclerosis* 1988;**8**:410–420.
14. Thubrikar MJ, Robicsek F. Pressure-induced arterial wall stress and atherosclerosis. *Ann Thorac Surg* 1995;**59**:1594–1603.
15. Lagos-Quintana M, Rauhut R, Lendeckel W, Tuschl T. Identification of novel genes coding for small expressed RNAs. *Science* 2001;**294**:853–858.
16. Bartel DP. MicroRNAs: target recognition and regulatory functions. *Cell* 2009;**136**:215–233.
17. Wightman B, Ha I, Ruvkun G. Posttranscriptional regulation of the heterochronic gene *lin-14* by *lin-4* mediates temporal pattern formation in *C. elegans*. *Cell* 1993;**75**:855–862.
18. Selbach M, Schwanhauser B, Thierfelder N, Fang Z, Khanin R, Rajewsky N. Widespread changes in protein synthesis induced by microRNAs. *Nature* 2008;**455**:58–63.
19. Hata A. Functions of MicroRNAs in cardiovascular biology and disease. *Ann Rev Physiol* 2013;**75**:69–93.
20. Chen K, Rajewsky N. The evolution of gene regulation by transcription factors and microRNAs. *Nat Rev Genet* 2007;**8**:93–103.
21. Krol J, Loedige I, Filipowicz W. The widespread regulation of microRNA biogenesis, function and decay. *Nat Rev Genet* 2010;**11**:597–610.
22. Kim VN, Han J, Siomi MC. Biogenesis of small RNAs in animals. *Nat Rev Mol Cell Biol* 2009;**10**:126–139.
23. Kawamata T, Seitz H, Tomari Y. Structural determinants of miRNAs for RISC loading and slicer-independent unwinding. *Nat Struct Mol Biol* 2009;**16**:953–960.
24. Czech B, Hannon GJ. Small RNA sorting: matchmaking for Argonautes. *Nat Rev Genet* 2010;**12**:19–31.
25. Ro S, Park C, Young D, Sanders KM, Yan W. Tissue-dependent paired expression of miRNAs. *Nucleic Acids Res* 2007;**35**:5944–5953.
26. Chatterjee S, Grosshans H. Active turnover modulates mature microRNA activity in *Caenorhabditis elegans*. *Nature* 2009;**461**:546–549.
27. Yao B, La LB, Chen YC, Chang LJ, Chan EK. Defining a new role of GW182 in maintaining miRNA stability. *EMBO Rep* 2012;**13**:1102–1108.
28. Baek D, Villén J, Shin C, Camargo FD, Gygi SP, Bartel DP. The impact of microRNAs on protein output. *Nature* 2008;**455**:64–71.
29. Mathonnet G, Fabian MR, Svitkin YV, Parsyan A, Huck L, Murata T et al. MicroRNA inhibition of translation initiation *in vitro* by targeting the cap-binding complex eIF4F. *Science* 2007;**317**:1764–1767.
30. Petersen CP, Bordeleau ME, Pelletier J, Sharp PA. Short RNAs repress translation after initiation in mammalian cells. *Mol Cell* 2006;**21**:533–542.
31. Fabian MR, Sonenberg N. The mechanics of miRNA-mediated gene silencing: a look under the hood of miRISC. *Nat Struct Mol Biol* 2012;**19**:586–593.
32. Wu L, Fan J, Belasco JG. MicroRNAs direct rapid deadenylation of mRNA. *Proc Natl Acad Sci USA* 2006;**103**:4034–4039.
33. le Noble F, Klein C, Tintu A, Pries A, Buschmann I. Neural guidance molecules, tip cells, and mechanical factors in vascular development. *Cardiovasc Res* 2008;**78**:232–241.
34. Nicoli S, Standley C, Walker R, Hurlstone A, Fogarty KE, Lawson ND. MicroRNA-mediated integration of haemodynamics and Vegf signalling during angiogenesis. *Nature* 2010;**464**:1196–1200.
35. Nazari-Jahantigh M, Wei Y, Schober A. The role of microRNAs in arterial remodelling. *Thromb Haemost* 2012;**107**:611–618.
36. Boon RA, Hergenreider E, Dimmeler S. Atheroprotective mechanisms of shear stress-regulated microRNAs. *Thromb Haemost* 2012;**108**:616–620.
37. Giraldez AJ, Cinalli RM, Glasner ME, Enright AJ, Thomson JM, Baskerville S et al. MicroRNAs regulate brain morphogenesis in zebrafish. *Science* 2005;**308**:833–838.
38. Suarez Y, Sessa WC. MicroRNAs as novel regulators of angiogenesis. *Circ Res* 2009;**104**:442–454.
39. Yang WJ, Yang DD, Na S, Sandusky GE, Zhang Q, Zhao G. Dicer is required for embryonic angiogenesis during mouse development. *J Biol Chem* 2005;**280**:9330–9335.
40. Suarez Y, Fernandez-Hernando C, Pober JS, Sessa WC. Dicer dependent microRNAs regulate gene expression and functions in human endothelial cells. *Circ Res* 2007;**100**:1164–1173.
41. Kuehbach A, Urbich C, Zeiher AM, Dimmeler S. Role of Dicer and Drosha for endothelial microRNA expression and angiogenesis. *Circ Res* 2007;**101**:59–68.
42. Suarez Y, Fernandez-Hernando C, Yu J, Gerber SA, Harrison KD, Pober JS et al. Dicer-dependent endothelial microRNAs are necessary for postnatal angiogenesis. *Proc Natl Acad Sci USA* 2008;**105**:14082–14087.
43. Liu N, Bezprozvannaya S, Williams AH, Qi X, Richardson JA, Bassel-Duby R et al. microRNA-133a regulates cardiomyocyte proliferation and suppresses smooth muscle gene expression in the heart. *Genes Dev* 2008;**22**:3242–3254.
44. Garcia-Cardena G, Comander J, Anderson KR, Blackman BR, Gimbrone MA Jr. Biomechanical activation of vascular endothelium as a determinant of its functional phenotype. *Proc Natl Acad Sci USA* 2001;**98**:4478–4485.
45. Dekker RJ, van Soest S, Fontijn RD, Salamanca S, de Groot PG, VanBavel E et al. Prolonged fluid shear stress induces a distinct set of endothelial cell genes, most specifically lung Kruppel-like factor (KLF2). *Blood* 2002;**100**:1689–1698.
46. Dekker RJ, van Thienen JV, Rohlena J, de Jager SC, Elderkamp YW, Seppen J et al. Endothelial KLF2 links local arterial shear stress levels to the expression of vascular tone-regulating genes. *Am J Pathol* 2005;**167**:609–618.
47. Mammoto A, Mammoto T, Ingber DE. Mechanosensitive mechanisms in transcriptional regulation. *J Cell Sci* 2012;**125**:3061–3073.
48. Orr AW, Sanders JM, Bevard M, Coleman E, Sarembock IJ, Schwartz MA. The subendothelial extracellular matrix modulates NF-kappaB activation by flow: a potential role in atherosclerosis. *J Cell Biol* 2005;**169**:191–202.
49. Tzima E, Irani-Tehrani M, Kiosses WB, Dejane E, Schultz DA, Engelhardt B et al. A mechanosensory complex that mediates the endothelial cell response to fluid shear stress. *Nature* 2005;**437**:426–431.
50. Qin X, Wang X, Wang Y, Tang Z, Cui Q, Xi J et al. MicroRNA-19a mediates the suppressive effect of laminar flow on cyclin D1 expression in human umbilical vein endothelial cells. *Proc Natl Acad Sci USA* 2010;**107**:3240–3244.
51. Wang KC, Garmire LX, Young A, Nguyen P, Trinh A, Subramaniam S et al. Role of microRNA-23b in flow-regulation of Rb phosphorylation and endothelial cell growth. *Proc Natl Acad Sci USA* 2010;**107**:3234–3239.
52. Weber M, Baker MB, Moore JP, Searles CD. MiR-21 is induced in endothelial cells by shear stress and modulates apoptosis and eNOS activity. *Biochem Biophys Res Commun* 2010;**393**:643–648.
53. Holliday CJ, Ankeny RF, Jo H, Nerem RM. Discovery of shear- and side-specific mRNAs and miRNAs in human aortic valvular endothelial cells. *Am J Physiol Heart Circ Physiol* 2011;**301**:H856–H867.
54. Ni CW, Qiu H, Jo H. MicroRNA-663 upregulated by oscillatory shear stress plays a role in inflammatory response of endothelial cells. *Am J Physiol Heart Circ Physiol* 2011;**300**:H1762–H1769.
55. Fang Y, Shi C, Manduchi E, Civelek M, Davies PF. MicroRNA-10a regulation of proinflammatory phenotype in athero-susceptible endothelium *in vivo* and *in vitro*. *Proc Natl Acad Sci USA* 2010;**107**:13450–13455.
56. Tehler D, Hoyland-Kroghsbo NM, Lund AH. The miR-10 microRNA precursor family. *RNA Biol* 2011;**8**:728–734.
57. Pearson JC, Lemons D, McGinnis W. Modulating Hox gene functions during animal body patterning. *Nat Rev Genet* 2005;**6**:893–904.
58. Garzon R, Pichiorri F, Palumbo T, Iuliano R, Cimmino A, Aqeilan R et al. MicroRNA fingerprints during human megakaryocytopoiesis. *Proc Natl Acad Sci USA* 2006;**103**:5078–5083.
59. Han L, Witmer PD, Casey E, Valle D, Sukumar S. DNA methylation regulates MicroRNA expression. *Cancer Biol Ther* 2007;**6**:1284–1288.
60. Weiss FU, Marques IJ, Woltering JM, Vleck DH, Aghdassi A, Partecke LI et al. Retinoic acid receptor antagonists inhibit miR-10a expression and block metastatic behavior of pancreatic cancer. *Gastroenterology* 2009;**137**:2136–2145 e2131–2137.
61. Huang H, Xie C, Sun X, Ritchie RP, Zhang J, Chen YE. miR-10a contributes to retinoid acid-induced smooth muscle cell differentiation. *J Biol Chem* 2010;**285**:9383–9389.
62. Ma L, Teruya-Feldstein J, Weinberg RA. Tumour invasion and metastasis initiated by microRNA-10b in breast cancer. *Nature* 2007;**449**:682–688.
63. Hergenreider E, Heydt S, Treguer K, Boettger T, Horrevoets AJ, Zeiher AM et al. Atheroprotective communication between endothelial cells and smooth muscle cells through miRNAs. *Nat Cell Biol* 2012;**14**:249–256.
64. Wang C, Deng L, Hong M, Akkaraju GR, Inoue J, Chen ZJ. TAK1 is a ubiquitin-dependent kinase of MKK and IKK. *Nature* 2001;**412**:346–351.
65. Kumarswamy R, Volkman I, Thum T. Regulation and function of miRNA-21 in health and disease. *RNA Biol* 2011;**8**:706–713.
66. Cai X, Hagedorn CH, Cullen BR. Human microRNAs are processed from capped, polyadenylated transcripts that can also function as mRNAs. *RNA (New York, NY)* 2004;**10**:1957–1966.
67. Loffler D, Brocke-Heidrich K, Pfeifer G, Stocsits C, Hacker Muller J, Kretzschmar AK et al. Interleukin-6 dependent survival of multiple myeloma cells involves the Stat3-mediated induction of microRNA-21 through a highly conserved enhancer. *Blood* 2007;**110**:1330–1333.
68. Fujita S, Ito T, Mizutani T, Minoguchi S, Yamamichi N, Sakurai K et al. miR-21 Gene expression triggered by AP-1 is sustained through a double-negative feedback mechanism. *J Mol Biol* 2008;**378**:492–504.



69. Ribas J, Lupold SE. The transcriptional regulation of miR-21, its multiple transcripts, and their implication in prostate cancer. *Cell Cycle* 2010;**9**:923–929.
70. Talotta F, Cimmino A, Matarazzo MR, Casalino L, De Vita G, D'Esposito M et al. An autoregulatory loop mediated by miR-21 and PDCC4 controls the AP-1 activity in RAS transformation. *Oncogene* 2009;**28**:73–84.
71. Huang GL, Zhang XH, Guo GL, Huang KT, Yang KY, Hu XQ. Expression of microRNA-21 in invasive ductal carcinoma of the breast and its association with phosphatase and tensin homolog deleted from chromosome expression and clinicopathologic features. *Zhonghua Yi Xue Za Zhi* 2008;**88**:2833–2837.
72. Seike M, Goto A, Okano T, Bowman ED, Schetter AJ, Horikawa I et al. MiR-21 is an EGFR-regulated anti-apoptotic factor in lung cancer in never-smokers. *Proc Natl Acad Sci USA* 2009;**106**:12085–12090.
73. Bhat-Nakshatri P, Wang G, Collins NR, Thomson MJ, Geistlinger TR, Carroll JS et al. Estradiol-regulated microRNAs control estradiol response in breast cancer cells. *Nucleic Acids Res* 2009;**37**:4850–4861.
74. Sabatel C, Malvaux L, Bovy N, Deroanne C, Lambert V, Gonzalez ML et al. MicroRNA-21 exhibits antiangiogenic function by targeting RhoB expression in endothelial cells. *PLoS ONE* 2011;**6**:e16979.
75. Zhou J, Wang KC, Wu W, Subramaniam S, Shyy JY, Chiu JJ et al. MicroRNA-21 targets peroxisome proliferator-activated receptor- $\alpha$  in an autoregulatory loop to modulate flow-induced endothelial inflammation. *Proc Natl Acad Sci USA* 2011;**108**:10355–10360.
76. Marx N, Sukhova GK, Collins T, Libby P, Plutzky J. PPAR $\alpha$  activators inhibit cytokine-induced vascular cell adhesion molecule-1 expression in human endothelial cells. *Circulation* 1999;**99**:3125–3131.
77. Tedgui A, Mallat Z. Anti-inflammatory mechanisms in the vascular wall. *Circ Res* 2001;**88**:877–887.
78. Fitch MJ, Campagnolo L, Kuhnert F, Stuhlmann H. Egr1, a novel epidermal growth factor-domain gene expressed in endothelial cells. *Dev Dyn* 2004;**230**:316–324.
79. Wang S, Aurora AB, Johnson BA, Qi X, McAnally J, Hill JA et al. The endothelial-specific microRNA miR-126 governs vascular integrity and angiogenesis. *Dev Cell* 2008;**15**:261–271.
80. Campagnolo L, Leahy A, Chitnis S, Koschnick S, Fitch MJ, Fallon JT et al. EGFL7 is a chemoattractant for endothelial cells and is up-regulated in angiogenesis and arterial injury. *Am J Pathol* 2005;**167**:275–284.
81. Fish JE, Santoro MM, Morton SU, Yu S, Yeh RF, Wythe JD et al. miR-126 regulates angiogenic signaling and vascular integrity. *Dev Cell* 2008;**15**:272–284.
82. Sessa R, Seano G, di Blasio L, Gagliardi PA, Isella C, Medico E et al. The miR-126 regulates angiopoietin-1 signaling and vessel maturation by targeting p85 $\beta$ . *Biochim Biophys Acta* 2012;**1823**:1925–1935.
83. Zernecke A, Bidzhekov K, Noels H, Shagdarsuren E, Gan L, Denecke B et al. Delivery of microRNA-126 by apoptotic bodies induces CXCL12-dependent vascular protection. *Sci Signal* 2009;**2**:ra81.
84. Yamakuchi M. MicroRNAs in vascular biology. *Int J Vasc Med* 2012;**2012**:794898.
85. Harris TA, Yamakuchi M, Ferlito M, Mendell JT, Lowenstein CJ. MicroRNA-126 regulates endothelial expression of vascular cell adhesion molecule 1. *Proc Natl Acad Sci USA* 2008;**105**:1516–1521.
86. Fichtlscherer S, De Rosa S, Fox H, Schwietz T, Fischer A, Liebetrau C et al. Circulating microRNAs in patients with coronary artery disease. *Circ Res* 2010;**107**:677–684.
87. Zampetaki A, Kiechl S, Drozdov I, Willeit P, Mayr U, Prokopi M et al. Plasma microRNA profiling reveals loss of endothelial miR-126 and other microRNAs in type 2 diabetes. *Circ Res* 2010;**107**:810–817.
88. Mocharfa P, Briand S, Giannotti G, Dorries C, Jakob P, Paneni F et al. AngiomiR-126 expression and secretion from circulating CD34(+) and CD14(+) PBMCs: role for proangiogenic effects and alterations in type 2 diabetics. *Blood* 2013;**121**:226–236.
89. Jakob P, Doerries C, Briand S, Mocharfa P, Krankel N, Besler C et al. Loss of angiomiR-126 and 130a in angiogenic early outgrowth cells from patients with chronic heart failure: role for impaired *in vivo* neovascularization and cardiac repair capacity. *Circulation* 2012;**126**:2962–2975.
90. Lechman ER, Gentner B, van Galen P, Giustacchini A, Saini M, Boccalatte FE et al. Attenuation of miR-126 activity expands HSC *in vivo* without exhaustion. *Cell Stem Cell* 2012;**11**:799–811.
91. Tanzer A, Stadler PF. Molecular evolution of a microRNA cluster. *J Mol Biol* 2004;**339**:327–335.
92. Olive V, Jiang I, He L. miR-17-92, a cluster of miRNAs in the midst of the cancer network. *Int J Biochem Cell Biol* 2010;**42**:1348–1354.
93. Sylvestre Y, De Guire V, Querido E, Mukhopadhyay UK, Bourdeau V, Major F et al. An E2F/miR-20a autoregulatory feedback loop. *J Biol Chem* 2007;**282**:2135–2143.
94. Woods K, Thomson JM, Hammond SM. Direct regulation of an oncogenic micro-RNA cluster by E2F transcription factors. *J Biol Chem* 2007;**282**:2130–2134.
95. Concepcion CP, Bonetti C, Ventura A. The microRNA-17–92 family of microRNA clusters in development and disease. *Cancer J (Sudbury, Mass)* 2012;**18**:262–267.
96. Wu W, Xiao H, Laguna-Fernandez A, Villarreal G Jr, Wang KC, Geary GG et al. Flow-dependent regulation of kruppel-like factor 2 is mediated by MicroRNA-92a. *Circulation* 2011;**124**:633–641.
97. Fang Y, Davies PF. Site-specific microRNA-92a regulation of Kruppel-like factors 4 and 2 in atherosusceptible endothelium. *Arterioscler Thromb Vasc Biol* 2012;**32**:979–987.
98. SenBanerjee S, Lin Z, Atkins GB, Greif DM, Rao RM, Kumar A et al. KLF2 Is a novel transcriptional regulator of endothelial proinflammatory activation. *J Exp Med* 2004;**199**:1305–1315.
99. Parmar KM, Larman HB, Dai G, Zhang Y, Wang ET, Moorthy SN et al. Integration of flow-dependent endothelial phenotypes by Kruppel-like factor 2. *J Clin Invest* 2006;**116**:49–58.
100. Hamik A, Lin Z, Kumar A, Balcells M, Sinha S, Katz J et al. Kruppel-like factor 4 regulates endothelial inflammation. *J Biol Chem* 2007;**282**:13769–13779.
101. McConnell BB, Yang VW. Mammalian Kruppel-like factors in health and diseases. *Physiol Rev* 2010;**90**:1337–1381.
102. Boon RA, Horrevoets AJ. Key transcriptional regulators of the vasoprotective effects of shear stress. *Hamostaseologie* 2009;**29**:39–40, 41–33.
103. Mack PJ, Zhang Y, Chung S, Vickerman V, Kamm RD, Garcia-Cardena G. Biomechanical regulation of endothelium-dependent events critical for adaptive remodeling. *J Biol Chem* 2009;**284**:8412–8420.
104. Wu J, Bohanan CS, Neumann JC, Lingrel JB. KLF2 transcription factor modulates blood vessel maturation through smooth muscle cell migration. *J Biol Chem* 2008;**283**:3942–3950.
105. Villarreal G Jr, Zhang Y, Larman HB, Gracia-Sancho J, Koo A, Garcia-Cardena G. Defining the regulation of KLF4 expression and its downstream transcriptional targets in vascular endothelial cells. *Biochem Biophys Res Commun* 2010;**391**:984–989.
106. Zhou Q, Gallagher R, Ufret-Vincenty R, Li X, Olson EN, Wang S. Regulation of angiogenesis and choroidal neovascularization by members of microRNA-23~27~24 clusters. *Proc Natl Acad Sci USA* 2011;**108**:8287–8292.
107. Urbich C, Kaluz D, Fromel T, Knau A, Bennewitz K, Boon RA et al. MicroRNA-27a/b controls endothelial cell repulsion and angiogenesis by targeting semaphorin 6A. *Blood* 2012;**119**:1607–1616.
108. Cordes KR, Sheehy NT, White MP, Berry EC, Morton SU, Muth AN et al. miR-145 and miR-143 regulate smooth muscle cell fate and plasticity. *Nature* 2009;**460**:705–710.
109. Xin M, Small EM, Sutherland LB, Qi X, McAnally J, Plato CF et al. MicroRNAs miR-143 and miR-145 modulate cytoskeletal dynamics and responsiveness of smooth muscle cells to injury. *Genes Dev* 2009;**23**:2166–2178.
110. Long X, Miano JM. Transforming growth factor- $\beta$ 1 (TGF- $\beta$ 1) utilizes distinct pathways for the transcriptional activation of microRNA 143/145 in human coronary artery smooth muscle cells. *J Biol Chem* 2011;**286**:30119–30129.
111. Boettger T, Beetz N, Kostin S, Schneider J, Kruger M, Hein L et al. Acquisition of the contractile phenotype by murine arterial smooth muscle cells depends on the Mir143/145 gene cluster. *J Clin Invest* 2009;**119**:2634–2647.
112. Elia L, Quintavalle M, Zhang J, Contu R, Cossu L, Latronico MV et al. The knockout of miR-143 and -145 alters smooth muscle cell maintenance and vascular homeostasis in mice: correlates with human disease. *Cell Death Differ* 2009;**16**:1590–1598.
113. Doran AC, Meller N, McNamara CA. Role of smooth muscle cells in the initiation and early progression of atherosclerosis. *Arterioscler Thromb Vasc Biol* 2008;**28**:812–819.
114. Lagos-Quintana M, Rauhut R, Yalcin A, Meyer J, Lendeckel W, Tuschl T. Identification of tissue-specific microRNAs from mouse. *Curr Biol* 2002;**12**:735–739.
115. Zhu N, Zhang D, Chen S, Liu X, Lin L, Huang X et al. Endothelial enriched microRNAs regulate angiotensin II-induced endothelial inflammation and migration. *Atherosclerosis* 2011;**215**:286–293.
116. O'Connell RM, Taganov KD, Boldin MP, Cheng G, Baltimore D. MicroRNA-155 is induced during the macrophage inflammatory response. *Proc Natl Acad Sci USA* 2007;**104**:1604–1609.
117. Thai TH, Calado DP, Casola S, Ansel KM, Xiao C, Xue Y et al. Regulation of the germinal center response by microRNA-155. *Science* 2007;**316**:604–608.
118. O'Connell RM, Zhao JL, Rao DS. MicroRNA function in myeloid biology. *Blood* 2011;**118**:2960–2969.
119. Elton TS, Selemion H, Elton SM, Parinandi NL. Regulation of the MIR155 host gene in physiological and pathological processes. *Gene* 2013; (in press).
120. Nazari-Jahantigh M, Wei Y, Noels H, Akhtar S, Zhou Z, Koenen RR et al. MicroRNA-155 promotes atherosclerosis by repressing Bcl6 in macrophages. *J Clin Invest* 2012;**122**:4190–4202.
121. Sun HX, Zeng DY, Li RT, Pang RP, Yang H, Hu YL et al. Essential role of MicroRNA-155 in regulating endothelium-dependent vasorelaxation by targeting endothelial nitric oxide synthase. *Hypertension* 2012;**60**:1407–1414.
122. Donners MM, Wolfs IM, Stoger LJ, van der Vorst EP, Pottgens CC, Heymans S et al. Hematopoietic miR155 deficiency enhances atherosclerosis and decreases plaque stability in hyperlipidemic mice. *PLoS ONE* 2012;**7**:e35877.
123. Wynne BM, Chiao CW, Webb RC. Vascular smooth muscle cell signaling mechanisms for contraction to angiotensin II and endothelin-1. *J Am Soc Hypertens* 2009;**3**:84–95.

124. Fyhrquist F, Metsarinne K, Tikkanen I. Role of angiotensin II in blood pressure regulation and in the pathophysiology of cardiovascular disorders. *J Human Hypertens* 1995; **9**(Suppl. 5):S19–S24.
125. Martin MM, Lee EJ, Buckenberger JA, Schmittgen TD, Elton TS. MicroRNA-155 regulates human angiotensin II type 1 receptor expression in fibroblasts. *J Biol Chem* 2006; **281**:18277–18284.
126. Faraoni I, Antonetti FR, Cardone J, Bonmassar E. miR-155 gene: a typical multifunctional microRNA. *Biochim Biophys Acta* 2009; **1792**:497–505.
127. Martin MM, Buckenberger JA, Jiang J, Malana GE, Nuovo GJ, Chotani M *et al*. The human angiotensin II type 1 receptor +1166 A/C polymorphism attenuates microRNA-155 binding. *J Biol Chem* 2007; **282**:24262–24269.
128. Wei Y, Nazari-Jahantigh M, Chan L, Zhu M, Heyll K, Corbalan-Campos J *et al*. The microRNA-342–5p fosters inflammatory macrophage activation through an Akt1- and microRNA-155-dependent pathway during atherosclerosis. *Circulation* 2013; **127**:1609–1619.
129. Chen K, Fan W, Wang X, Ke X, Wu G, Hu C. MicroRNA-101 mediates the suppressive effect of laminar shear stress on mTOR expression in vascular endothelial cells. *Biochem Biophys Res Commun* 2012; **427**:138–142.
130. Fingar DC, Richardson CJ, Tee AR, Cheatham L, Tsou C, Blenis J. mTOR controls cell cycle progression through its cell growth effectors S6K1 and 4E-BP1/eukaryotic translation initiation factor 4E. *Mol Cell Biol* 2004; **24**:200–216.
